# Supplementary material
Source: PubMed Central journal article supplement (PMC4131699)

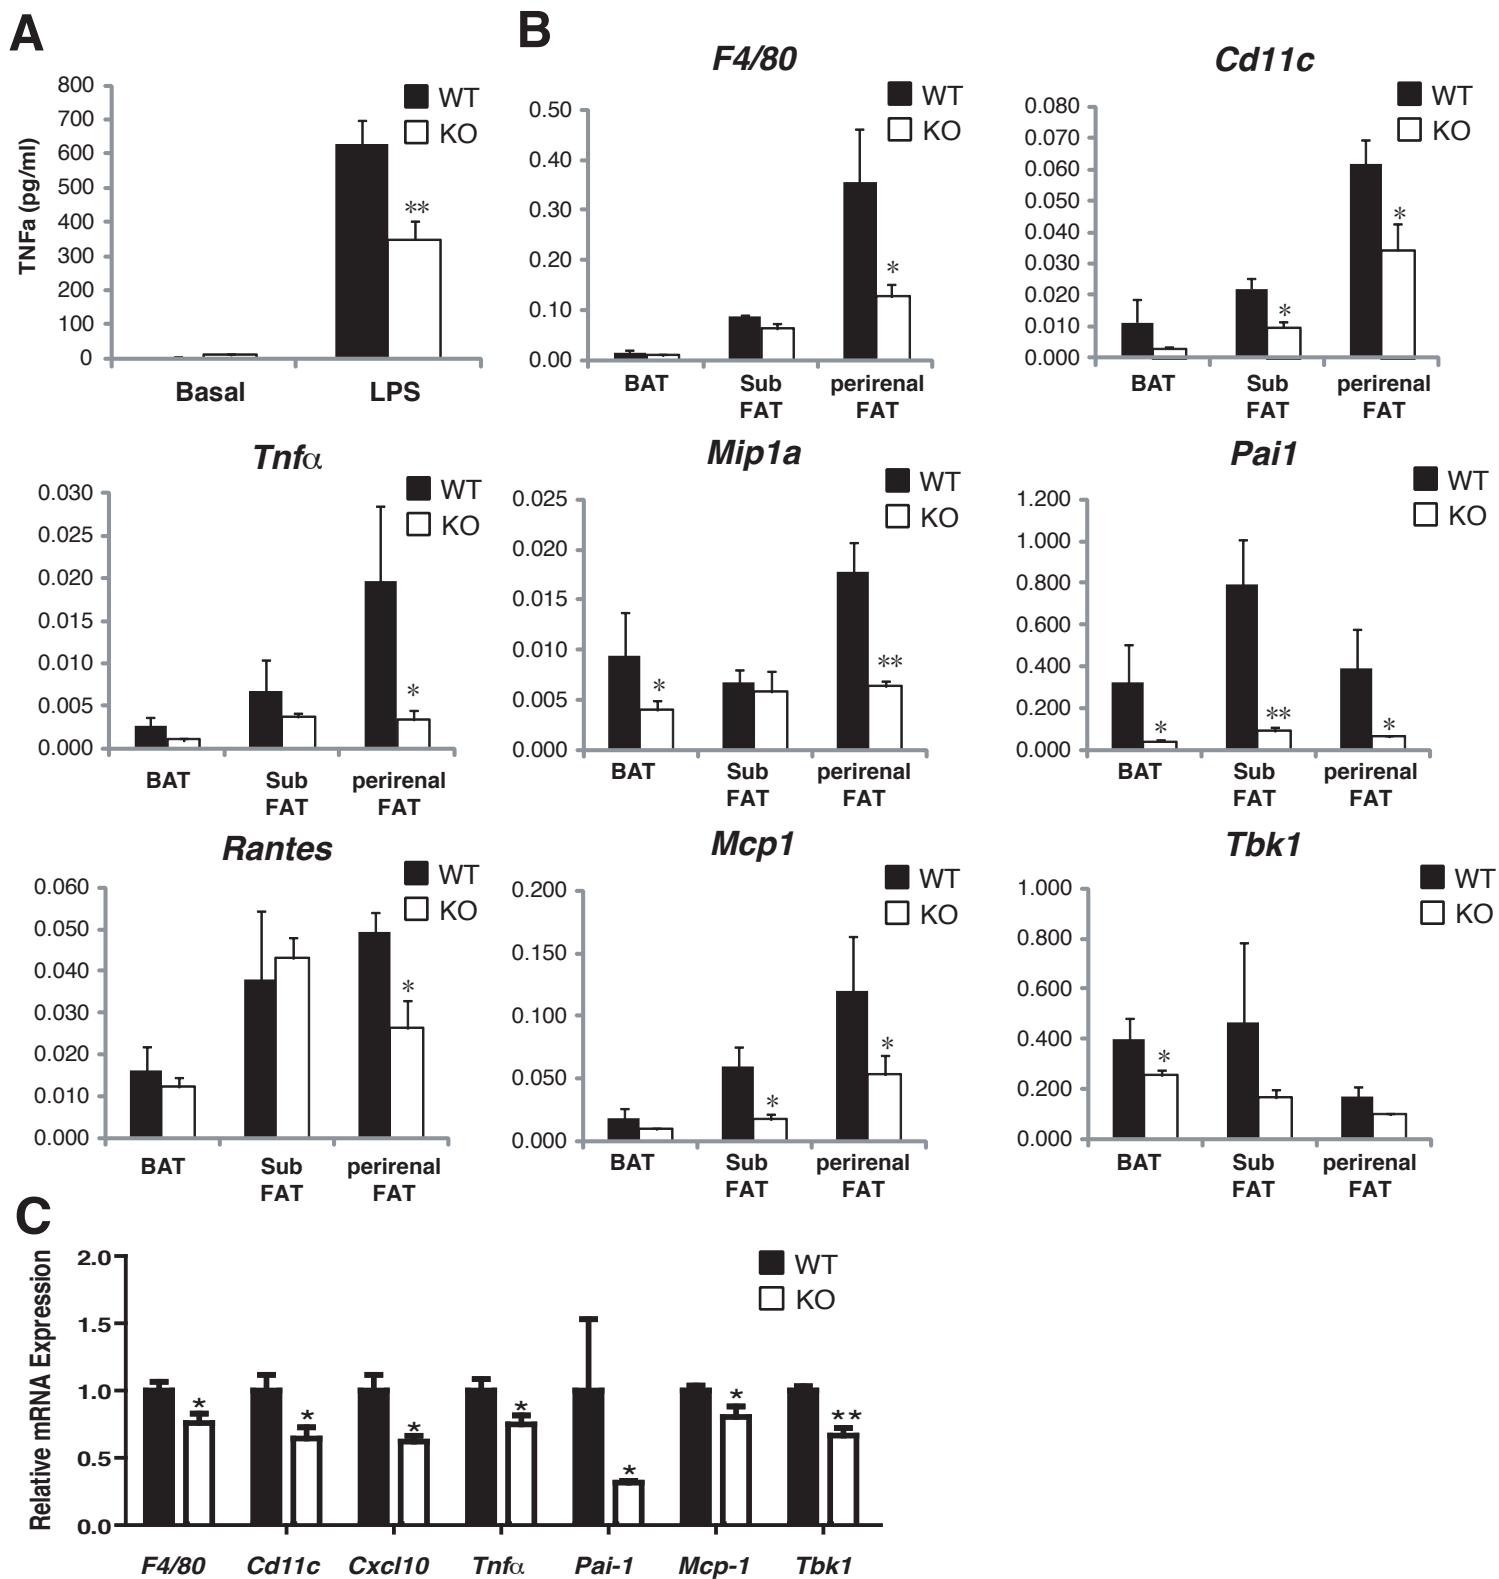

Figure S1

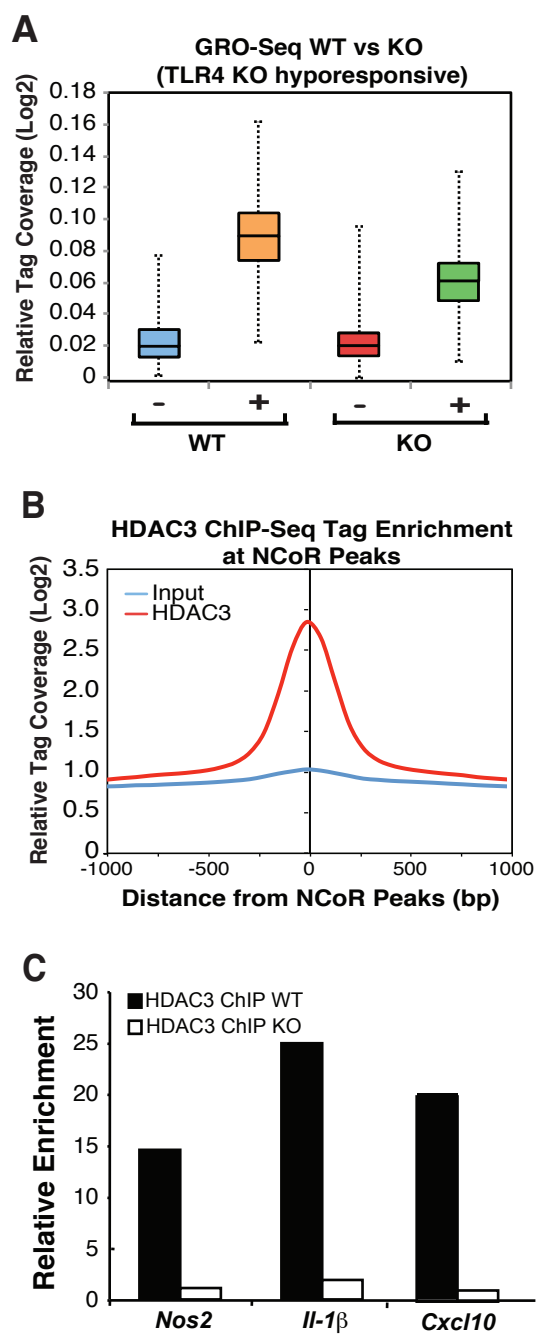

Figure S2

A

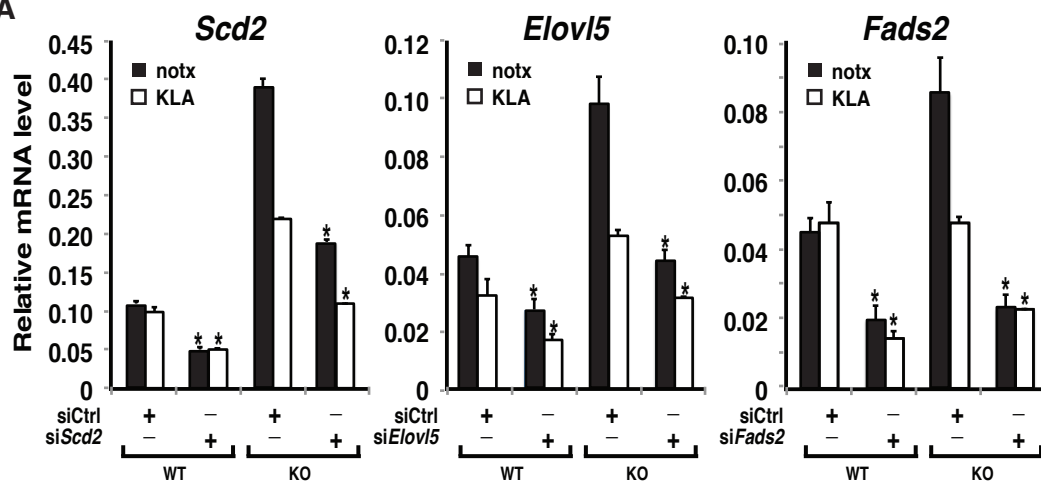

B

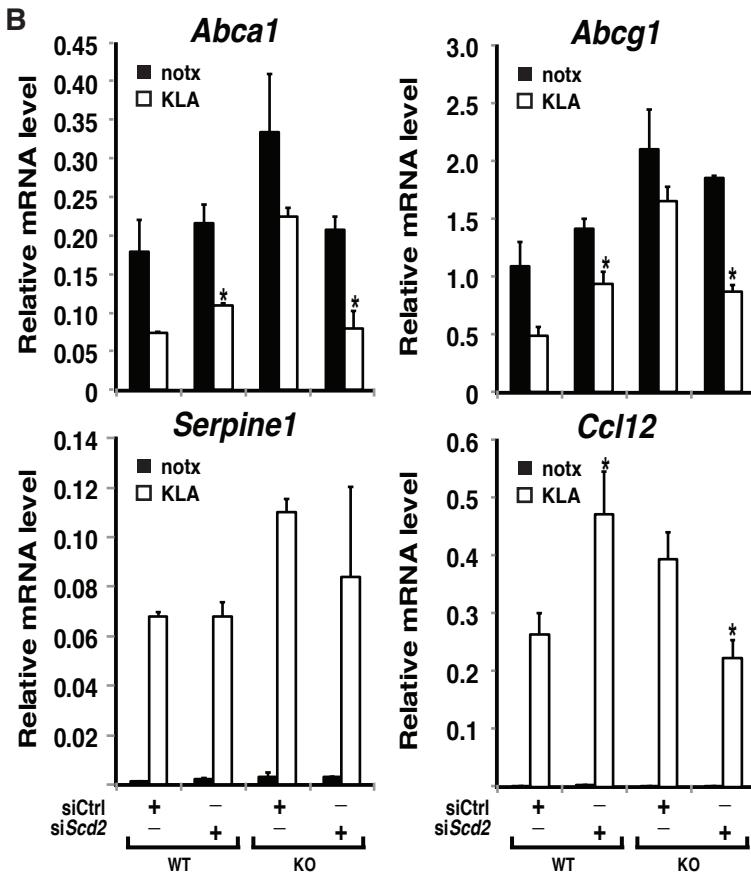

C

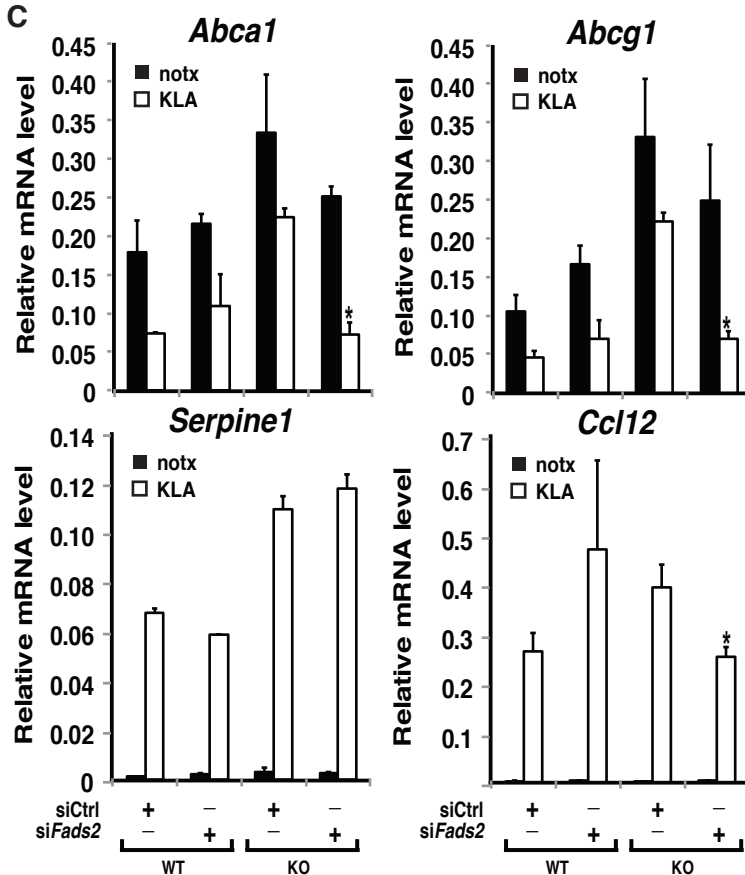

Figure S3

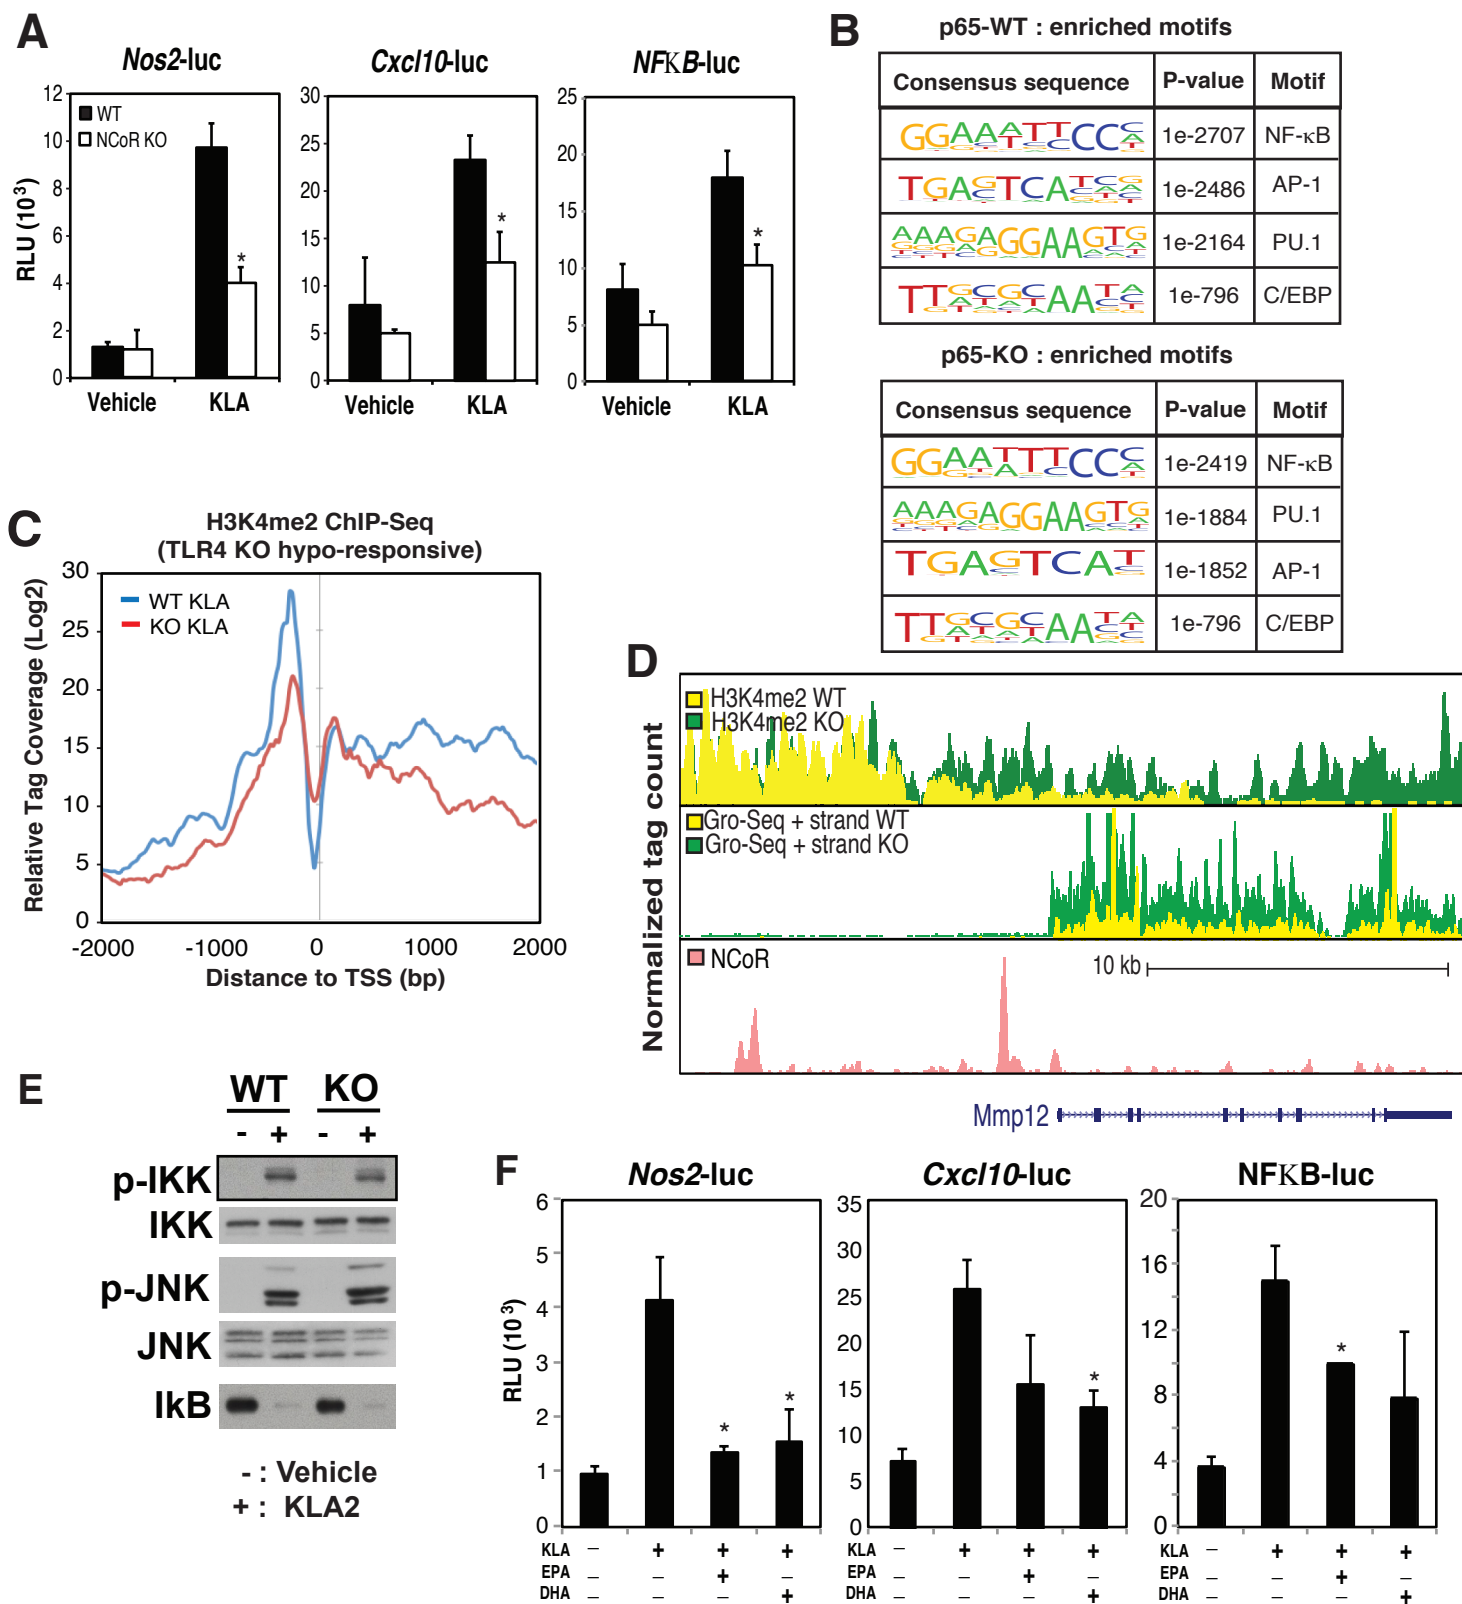

Figure S4

Supplement: NIHMS523109-supplement-02.pdf [file NIHMS523109-supplement-02.pdf]
